# Supplementary material for: Does [TcF(CO)5] exist? The crystal and molecular structure of [Tc(CO)3(OH)0.49F0.51]4·[Tc(CO)5(BF4)]
Source: Royal Society of Chemistry journal article supplement (doi:10.1039/c6dt00958a), 2016-01-01

## Electronic Supporting Information

### Can $[\text{TcF}(\text{CO})_5]$ does Exist? Crystal and Molecular Structure of $[\text{Tc}(\text{CO})_3(\text{OH})_{0.49}\text{F}_{0.51}]_4^*[\text{Tc}(\text{CO})_5(\text{BF}_4)]$

Ekaterina S. Stepanova<sup>a</sup>, Vladislav V. Gurzhiy <sup>b</sup>, Margarita Yu. Tyupina<sup>a</sup>, Alexander E. Miroslavov <sup>a</sup>, Georgy V. Sidorenko <sup>a</sup>, Alexander A. Lumpov<sup>a</sup>

<sup>a</sup> *Khlopin Radium Institute, 2-i Murinskii pr. 28, St. Petersburg, 194021 Russia*

<sup>b</sup> *Department of Crystallography, St. Petersburg State University, University emb. 7/9, St. Petersburg, 199034 Russia*

E-mail address of the corresponding author: [amiroslav@mail.ru](mailto:amiroslav@mail.ru) Miroslavov Alexander

## Table of Contents

### Page #

- S3 Table S1. Selected bond lengths ( $d$ , Å) for **1**.
- S4 Table S2. Selected bond angles ( $\omega$ , °) for  $[\text{Tc}(\text{CO})_3(\text{OH})_{0.49}\text{F}_{0.51}]_4$  in the structure of **1**.
- S5 Table S3. Selected bond angles ( $\omega$ , °) for complex  $[\text{Tc}(\text{CO})_5(\text{BF}_4)]$  in the structure of **1**.
- S6 Figure S1. IR-spectrum  $[\text{TcI}(\text{CO})_5]$  in  $\text{CH}_2\text{Cl}_2$ .

Table S1. Selected bond lengths ( $d$ , Å) for **1**.

| Bond                                                                  |          | Bond    |          |
|-----------------------------------------------------------------------|----------|---------|----------|
| Complex $[\text{Tc}(\text{CO})_3(\text{OH})_{0.49}\text{F}_{0.51}]_4$ |          |         |          |
| Tc1-F1                                                                | 2.189(3) | Tc4-F4  | 2.184(2) |
| Tc1-F2                                                                | 2.224(2) | Tc4-C41 | 1.861(5) |
| Tc1-F3                                                                | 2.181(3) | Tc4-C42 | 1.886(5) |
| Tc1-C11                                                               | 1.897(4) | Tc4-C43 | 1.892(5) |
| Tc1-C12                                                               | 1.898(4) | O11-C11 | 1.134(5) |
| Tc1-C13                                                               | 1.866(5) | O12-C12 | 1.137(5) |
| Tc2-F1                                                                | 2.196(3) | O13-C13 | 1.157(5) |
| Tc2-F3                                                                | 2.192(3) | O21-C21 | 1.138(5) |
| Tc2-F4                                                                | 2.193(3) | O22-C22 | 1.135(5) |
| Tc2-C21                                                               | 1.903(4) | O23-C23 | 1.152(5) |
| Tc2-C22                                                               | 1.901(4) | O31-C31 | 1.143(5) |
| Tc2-C23                                                               | 1.875(5) | O32-C32 | 1.144(5) |
| Tc3-F2                                                                | 2.195(2) | O33-C33 | 1.150(6) |
| Tc3-F3                                                                | 2.178(3) | O41-C41 | 1.151(5) |
| Tc3-F4                                                                | 2.188(2) | O42-C42 | 1.139(5) |
| Tc3-C31                                                               | 1.888(5) | O43-C43 | 1.148(5) |
| Tc3-C32                                                               | 1.874(4) | O1-H1   | 0.85(10) |
| Tc3-C33                                                               | 1.883(5) | O2-H2   | 0.90(2)  |
| Tc4-F1                                                                | 2.187(3) | O3-H3   | 0.87(9)  |
| Tc4-F2                                                                | 2.180(2) | O4-H4   | 0.90(2)  |
| Complex $[\text{Tc}(\text{CO})_5(\text{BF}_4)]$                       |          |         |          |
| Tc5-F56                                                               | 2.178(3) | F58-B1  | 1.392(6) |
| Tc5-C51                                                               | 1.895(6) | F59-B1  | 1.380(6) |
| Tc5-C52                                                               | 2.002(6) | O51-C51 | 1.144(7) |
| Tc5-C53                                                               | 2.006(5) | O52-C52 | 1.120(6) |
| Tc5-C54                                                               | 2.027(5) | O53-C53 | 1.121(5) |
| Tc5-C55                                                               | 2.024(5) | O54-C54 | 1.115(5) |
| F56-B1                                                                | 1.451(6) | O55-C55 | 1.104(6) |
| F57-B1                                                                | 1.405(6) |         |          |

Table S2. Selected bond angles ( $\omega$ , °) for  $[\text{Tc}(\text{CO})_3(\text{OH})_{0.49}\text{F}_{0.51}]_4$  in the structure of **1**.

| Angle       |            | Angle       |            |
|-------------|------------|-------------|------------|
| F1-Tc1-F2   | 75.05(11)  | C33-Tc3-F3  | 170.10(17) |
| F3-Tc1-F1   | 75.46(12)  | C33-Tc3-F4  | 95.31(16)  |
| F3-Tc1-F2   | 73.21(10)  | C33-Tc3-C31 | 87.9(2)    |
| C11-Tc1-F1  | 173.26(16) | F2-Tc4-F1   | 75.99(10)  |
| C11-Tc1-F2  | 99.21(15)  | F2-Tc4-F4   | 75.02(9)   |
| C11-Tc1-F3  | 99.66(15)  | F4-Tc4-F1   | 73.49(10)  |
| C11-Tc1-C12 | 88.16(17)  | C41-Tc4-F1  | 98.38(18)  |
| C12-Tc1-F1  | 96.24(14)  | C41-Tc4-F2  | 173.07(17) |
| C12-Tc1-F2  | 99.90(15)  | C41-Tc4-F4  | 99.65(16)  |
| C12-Tc1-F3  | 170.23(16) | C41-Tc4-C42 | 86.7(2)    |
| C13-Tc1-F1  | 98.69(14)  | C41-Tc4-C43 | 89.1(2)    |
| C13-Tc1-F2  | 170.96(12) | C42-Tc4-F1  | 171.35(17) |
| C13-Tc1-F3  | 99.08(14)  | C42-Tc4-F2  | 98.41(17)  |
| C13-Tc1-C11 | 86.59(18)  | C42-Tc4-F4  | 98.83(16)  |
| C13-Tc1-C12 | 87.15(18)  | C42-Tc4-C43 | 85.0(2)    |
| F3-Tc2-F1   | 75.10(11)  | C43-Tc4-F1  | 101.98(16) |
| F3-Tc2-F4   | 75.14(10)  | C43-Tc4-F2  | 95.98(15)  |
| F4-Tc2-F1   | 73.15(10)  | C43-Tc4-F4  | 170.59(16) |
| C21-Tc2-F1  | 98.95(14)  | Tc1-F1-Tc2  | 102.13(12) |
| C21-Tc2-F3  | 170.72(17) | Tc4-F1-Tc1  | 102.63(12) |
| C21-Tc2-F4  | 96.44(16)  | Tc4-F1-Tc2  | 105.42(13) |
| C22-Tc2-F1  | 170.80(16) | Tc3-F2-Tc1  | 104.27(10) |
| C22-Tc2-F3  | 98.13(16)  | Tc4-F2-Tc1  | 101.71(9)  |
| C22-Tc2-F4  | 99.29(15)  | Tc4-F2-Tc3  | 103.12(9)  |
| C22-Tc2-C21 | 86.95(18)  | Tc1-F3-Tc2  | 102.55(13) |
| C23-Tc2-F1  | 99.92(15)  | Tc3-F3-Tc1  | 106.34(13) |
| C23-Tc2-F3  | 100.00(15) | Tc3-F3-Tc2  | 102.29(12) |
| C23-Tc2-F4  | 172.26(13) | Tc3-F4-Tc2  | 101.91(10) |
| C23-Tc2-C21 | 87.9(2)    | Tc4-F4-Tc2  | 105.61(10) |
| C23-Tc2-C22 | 87.28(19)  | Tc4-F4-Tc3  | 103.22(9)  |
| F3-Tc3-F2   | 73.83(10)  | O11-C11-Tc1 | 178.2(4)   |
| F3-Tc3-F4   | 75.51(11)  | O12-C12-Tc1 | 179.1(4)   |
| F4-Tc3-F2   | 74.64(9)   | O13-C13-Tc1 | 179.1(4)   |
| C31-Tc3-F2  | 99.44(15)  | O21-C21-Tc2 | 179.1(4)   |
| C31-Tc3-F3  | 100.93(17) | O22-C22-Tc2 | 179.0(5)   |
| C31-Tc3-F4  | 173.69(15) | O23-C23-Tc2 | 178.8(4)   |
| C32-Tc3-F2  | 169.52(16) | O31-C31-Tc3 | 176.2(4)   |
| C32-Tc3-F3  | 96.28(17)  | O32-C32-Tc3 | 176.6(5)   |
| C32-Tc3-F4  | 99.81(16)  | O33-C33-Tc3 | 177.8(5)   |
| C32-Tc3-C31 | 85.7(2)    | O41-C41-Tc4 | 178.9(5)   |
| C32-Tc3-C33 | 88.8(2)    | O42-C42-Tc4 | 177.7(5)   |
| C33-Tc3-F2  | 100.42(15) | O43-C43-Tc4 | 176.7(4)   |

Table S3. Selected bond angles ( $\omega$ , °) for complex  $[\text{Tc}(\text{CO})_5(\text{BF}_4)]$  in the structure of **1**.

| Angle       |            | Angle       |           |
|-------------|------------|-------------|-----------|
| C51-Tc5-F56 | 179.2(3)   | C55-Tc5-C54 | 90.77(18) |
| C51-Tc5-C52 | 89.7(3)    | B1-F56-Tc5  | 127.2(3)  |
| C51-Tc5-C53 | 90.5(2)    | O51-C51-Tc5 | 177.0(8)  |
| C51-Tc5-C54 | 89.9(3)    | O52-C52-Tc5 | 177.8(4)  |
| C51-Tc5-C55 | 90.2(3)    | O53-C53-Tc5 | 177.0(4)  |
| C52-Tc5-F56 | 90.99(18)  | O54-C54-Tc5 | 176.6(4)  |
| C52-Tc5-C53 | 90.0(2)    | O55-C55-Tc5 | 176.8(5)  |
| C52-Tc5-C54 | 178.64(19) | F57-B1-F56  | 110.3(4)  |
| C52-Tc5-C55 | 87.9(2)    | F58-B1-F56  | 109.8(4)  |
| C53-Tc5-F56 | 89.26(15)  | F58-B1-F57  | 106.7(4)  |
| C53-Tc5-C54 | 91.31(18)  | F59-B1-F56  | 109.6(4)  |
| C53-Tc5-C55 | 177.80(19) | F59-B1-F57  | 109.4(4)  |
| C54-Tc5-F56 | 89.42(15)  | F59-B1-F58  | 111.0(4)  |
| C55-Tc5-F56 | 90.04(17)  |             |           |

Figure S1. IR-spectrum  $[\text{TcI}(\text{CO})_5]$  in  $\text{CH}_2\text{Cl}_2$ .

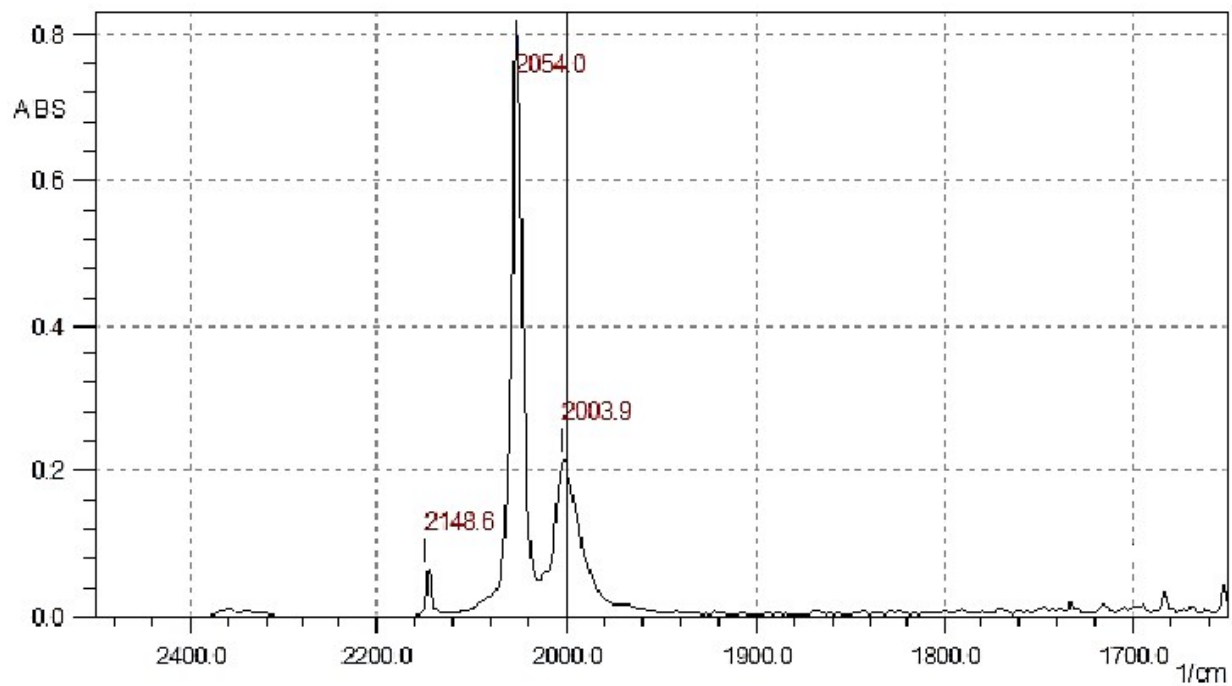

Supplement: c6dt00958a1.pdf [file c6dt00958a1.pdf]
